# Supplementary material for: Hypertension Health Promotion via Text Messaging at a Community Health Center in South Africa: A Mixed Methods Study
Source: PubMed Central journal article supplement (PMC4807246; doi:10.2196/mhealth.4569), 2016-03-10
Supplement: mhealth_v4i1e22_app4.pdf [file mhealth_v4i1e22_app4.pdf]

## **Multimedia Appendix 4**

### **Score calculation:**

Questions specific to the condition of hypertension:

*What is high blood pressure?*

*What is normal blood pressure?*

*What puts you at risk of developing high blood pressure?*

*Does everybody who has high blood pressure have symptoms?*

*What complications may you prevent by managing your high blood pressure?*

*Can you stop taking your medication without asking your doctor?*

*Can high blood pressure be cured?*

*When you leave Cape Town, which one of the following is right?*

*If you have high blood pressure, contact the clinic if you have which of the following symptoms?*

Questions specific to health-seeking behaviour:

*Can you reduce your blood pressure?*

*Is smoking good or bad if you have high blood pressure?*

*Is keeping a normal weight important if you have high blood pressure?*

*How much should you drink, if at all, when you have high blood pressure?*

*How much should you exercise three days a week?*

*What are the best ways to manage your stress?*

*Do eating habits affect blood pressure?*

*Is salt good or bad for a person with high blood pressure?*

*What should you cut down on if you have high blood pressure?*

*Are vegetables and fruit good for a person with high blood pressure?*

- Note: Question about cooking with butter or margarine excluded, as it was only asked at baseline.
- For the questions which had fixed choice answers, a score of 1 was assigned if the participant chose the correct answer, and a score of -1 if they chose the incorrect answer or a score of 0 if they answered that they did not know.
- For the questions where participants could give more than one answer, the number of incorrect answers was subtracted from the number of correct answers.
